# Supplementary material
Source: PubMed Central journal article supplement (PMC4527178)

## SUPPLEMENTAL INFORMATION

### **Supplemental Table 1 – Amino acid residues and the corresponding transmembrane helices found within 4.5 Å of the highest affinity docking poses of Verapamil and Daunorubicin in the starting wide open to the cytoplasm conformation of P-glycoprotein.**

The table lists contacts for each of the six independent simulations. Lists were compiled after the respective P-glycoprotein, lipid, water and drug systems had been independently heated and equilibrated at 310 K. Helix “0” indicates contacts outside of the transmembrane region of the protein. TM helices were the same as listed in the Uniprot database (<http://www.uniprot.org/uniprot/P08183>). Residues that have been experimentally determined to contribute to transport drug binding are identified in the respective columns. Numbers refer to the following experimental works with residue numbers for human P-gp:

- 1) Loo, T. W., Bartlett, M. C., and Clarke, D. M. (2009) Identification of residues in the drug translocation pathway of the human multidrug resistance P-glycoprotein by arginine mutagenesis, *J Biol Chem* 284, 24074-24087;
- 2) Li, J., Jaimes, K. F., and Aller, S. G. (2014) Refined structures of mouse P-glycoprotein, *Protein Sci* 23, 34-46;
- 3) Loo, T. W., and Clarke, D. M. (2005) Do drug substrates enter the common drug-binding pocket of P-glycoprotein through "gates"?, *Biochem Biophys Res Commun* 329, 419-422;
- 4) Loo, T. W., Bartlett, M. C., and Clarke, D. M. (2006) Transmembrane segment 1 of human P-glycoprotein contributes to the drug-binding pocket, *Biochem J* 396, 537-545;

- 5) Loo, T. W., Bartlett, M. C., and Clarke, D. M. (2006) Transmembrane segment 7 of human P-glycoprotein forms part of the drug-binding pocket, *Biochem J* 399, 351-359;
- 6) Loo, T. W., Bartlett, M. C., and Clarke, D. M. (2007) Suppressor mutations in the transmembrane segments of P-glycoprotein promote maturation of processing mutants and disrupt a subset of drug-binding sites, *J Biol Chem* 282, 32043-32052.
- 7) Loo, T. W., Bartlett, M. C., and Clarke, D. M. (2008) Arginines in the first transmembrane segment promote maturation of a P-glycoprotein processing mutant by hydrogen bond interactions with tyrosines in transmembrane segment 11, *J Biol Chem* 283, 24860-24870;
- 8) Loo, T. W., and Clarke, D. M. (2013) Drug rescue distinguishes between different structural models of human P-glycoprotein, *Biochemistry* 52, 7167-7169.

Computationally observed daunorubicin binding sites:

- 9) Ma, J., and Biggin, P. C. (2013) Substrate versus inhibitor dynamics of P-glycoprotein, *Proteins* 81, 1653-1668.

| <u>Dauno-</u><br><u>rubicin</u><br><u>1</u> | <u>resname</u> | <u>resid</u> | <u>TM-</u><br><u>helix</u> | <u>AA-type</u> | <u>Exp't-</u><br><u>ally</u><br><u>ID'd</u> | <u>Vera-</u><br><u>pamil</u><br><u>1</u> | <u>resname</u> | <u>resid</u> | <u>TM-</u><br><u>helix</u> | <u>AA-type</u> | <u>Exp't-</u><br><u>ally</u><br><u>ID'd</u> |
|---------------------------------------------|----------------|--------------|----------------------------|----------------|---------------------------------------------|------------------------------------------|----------------|--------------|----------------------------|----------------|---------------------------------------------|
|                                             | HIS            | 61           | 1                          | basic          | 7                                           |                                          | TRP            | 232          | 4                          | aromatic       |                                             |
|                                             | LEU            | 65           | 1                          | nonpolar       | 2,4,7                                       |                                          | ILE            | 299          | 5                          | nonpolar       |                                             |
|                                             | ALA            | 129          | 2                          | nonpolar       |                                             |                                          | ALA            | 302          | 5                          | nonpolar       | 1,8                                         |
|                                             | GLN            | 132          | 2                          | polar          |                                             |                                          | PHE            | 303          | 5                          | aromatic       | 2                                           |
|                                             | VAL            | 133          | 2                          | nonpolar       |                                             |                                          | ILE            | 306          | 5                          | nonpolar       | 3,5                                         |
|                                             | ASP            | 188          | 3                          | acidic         |                                             |                                          | TYR            | 307          | 5                          | aromatic       | 2                                           |
|                                             | LYS            | 189          | 3                          | basic          |                                             |                                          | TYR            | 310          | 5                          | aromatic       | 2                                           |
|                                             | MET            | 192          | 3                          | nonpolar       |                                             |                                          | PHE            | 336          | 6                          | aromatic       | 2,9                                         |
|                                             | GLN            | 195          | 3                          | polar          |                                             |                                          | PHE            | 343          | 6                          | aromatic       | 2,3,<br>5,6                                 |
|                                             | GLN            | 347          | 6                          | polar          |                                             |                                          | GLN            | 725          | 7                          | polar          | 2                                           |
|                                             | PHE            | 942          | 11                         | aromatic       | 1,3,9                                       |                                          | PRO            | 726          | 7                          | nonpolar       |                                             |
|                                             | GLN            | 946          | 11                         | polar          | 1                                           |                                          | PHE            | 728          | 7                          | aromatic       | 2,5                                         |
|                                             | TYR            | 950          | 11                         | aromatic       |                                             |                                          | ALA            | 729          | 7                          | nonpolar       |                                             |
|                                             |                |              |                            |                |                                             |                                          | PHE            | 732          | 7                          | aromatic       | 2                                           |
|                                             |                |              |                            |                |                                             |                                          | PHE            | 770          | 8                          | aromatic       | 2                                           |
|                                             |                |              |                            |                |                                             |                                          | SER            | 979          | 12                         | polar          |                                             |
|                                             |                |              |                            |                |                                             |                                          | VAL            | 982          | 12                         | nonpolar       | 3,9                                         |
|                                             |                |              |                            |                |                                             |                                          | PHE            | 983          | 12                         | aromatic       | 2                                           |
|                                             |                |              |                            |                |                                             |                                          | MET            | 986          | 12                         | nonpolar       | 2                                           |
|                                             |                |              |                            |                |                                             |                                          | GLN            | 990          | 12                         | polar          | 2,9                                         |

| <u>Dauno-</u><br><u>rubicin</u><br><u>2</u> | <u>resname</u> | <u>resid</u> | <u>TM-</u><br><u>helix</u> | <u>AA-type</u> | <u>Exp't-</u><br><u>ally</u><br><u>ID'd</u> | <u>Vera-</u><br><u>pamil</u><br><u>2</u> | <u>resname</u> | <u>resid</u> | <u>TM-</u><br><u>helix</u> | <u>AA-type</u> | <u>Exp't-</u><br><u>ally</u><br><u>ID'd</u> |
|---------------------------------------------|----------------|--------------|----------------------------|----------------|---------------------------------------------|------------------------------------------|----------------|--------------|----------------------------|----------------|---------------------------------------------|
|                                             | HIS            | 61           | 1                          | basic          | 7                                           |                                          | TRP            | 232          | 4                          | aromatic       |                                             |
|                                             | LEU            | 65           | 1                          | nonpolar       | 2,4,7                                       |                                          | ILE            | 299          | 5                          | nonpolar       | 2                                           |
|                                             | VAL            | 125          | 2                          | nonpolar       |                                             |                                          | ALA            | 302          | 5                          | nonpolar       | 1,8                                         |
|                                             | ALA            | 129          | 2                          | nonpolar       |                                             |                                          | PHE            | 303          | 5                          | aromatic       | 2                                           |
|                                             | GLN            | 132          | 2                          | polar          |                                             |                                          | ILE            | 306          | 5                          | nonpolar       | 3,5                                         |
|                                             | VAL            | 133          | 2                          | nonpolar       |                                             |                                          | TYR            | 310          | 5                          | aromatic       | 2                                           |
|                                             | ASP            | 188          | 3                          | acidic         |                                             |                                          | PHE            | 336          | 6                          | aromatic       | 2,9                                         |
|                                             | MET            | 192          | 3                          | nonpolar       |                                             |                                          | LEU            | 339          | 6                          | nonpolar       | 1,3,9                                       |
|                                             | GLN            | 195          | 3                          | polar          |                                             |                                          | ILE            | 340          | 6                          | nonpolar       | 2,3                                         |
|                                             | GLN            | 347          | 6                          | polar          |                                             |                                          | PHE            | 343          | 6                          | aromatic       | 2,3,<br>5,6                                 |
|                                             | GLU            | 875          | 0                          | acidic         |                                             |                                          | PHE            | 728          | 7                          | aromatic       | 2,5                                         |
|                                             | MET            | 876          | 0                          | nonpolar       |                                             |                                          | PHE            | 770          | 8                          | aromatic       | 2                                           |
|                                             | LEU            | 879          | 0                          | nonpolar       |                                             |                                          | VAL            | 982          | 12                         | nonpolar       | 3,9                                         |
|                                             | PHE            | 938          | 11                         | aromatic       |                                             |                                          | MET            | 986          | 12                         | nonpolar       | 2                                           |
|                                             | PHE            | 942          | 11                         | aromatic       | 1,3,9                                       |                                          | GLN            | 990          | 12                         | polar          | 2,9                                         |
|                                             | GLN            | 946          | 11                         | polar          | 1                                           |                                          | SER            | 993          | 12                         | polar          | 1                                           |
|                                             | MET            | 949          | 11                         | nonpolar       | 2,9                                         |                                          | PHE            | 994          | 12                         | aromatic       |                                             |
|                                             | TYR            | 950          | 11                         | aromatic       |                                             |                                          |                |              |                            |                |                                             |

| <u>Dauno-</u><br><u>rubicin</u><br><u>3</u> | <u>resname</u> | <u>resid</u> | <u>TM-</u><br><u>helix</u> | <u>AA-type</u> | <u>Exp't-</u><br><u>ally</u><br><u>ID'd</u> | <u>Vera-</u><br><u>pamil</u><br><u>3</u> | <u>resname</u> | <u>resid</u> | <u>TM-</u><br><u>helix</u> | <u>AA-type</u> | <u>Exp't-</u><br><u>ally</u><br><u>ID'd</u> |
|---------------------------------------------|----------------|--------------|----------------------------|----------------|---------------------------------------------|------------------------------------------|----------------|--------------|----------------------------|----------------|---------------------------------------------|
|                                             | HIS            | 61           | 1                          | basic          | 7                                           |                                          | TRP            | 232          | 4                          | aromatic       |                                             |
|                                             | LEU            | 65           | 1                          | nonpolar       | 2,4,7                                       |                                          | ILE            | 299          | 5                          | nonpolar       | 2                                           |
|                                             | ALA            | 129          | 2                          | nonpolar       |                                             |                                          | ALA            | 302          | 5                          | nonpolar       | 1,8                                         |
|                                             | GLN            | 132          | 2                          | polar          |                                             |                                          | PHE            | 303          | 5                          | aromatic       | 2,9                                         |
|                                             | VAL            | 133          | 2                          | nonpolar       |                                             |                                          | ILE            | 306          | 5                          | nonpolar       | 3,5                                         |
|                                             | MET            | 192          | 3                          | nonpolar       |                                             |                                          | TYR            | 307          | 5                          | aromatic       | 2                                           |
|                                             | GLN            | 195          | 3                          | polar          |                                             |                                          | TYR            | 310          | 5                          | aromatic       | 2                                           |
|                                             | GLN            | 347          | 6                          | polar          |                                             |                                          | PHE            | 336          | 6                          | aromatic       | 2,9                                         |
|                                             | PRO            | 350          | 6                          | nonpolar       |                                             |                                          | ILE            | 340          | 6                          | nonpolar       | 2,3                                         |
|                                             | GLU            | 875          | 0                          | acidic         |                                             |                                          | PHE            | 343          | 6                          | aromatic       | 2,3,<br>5,6                                 |
|                                             | PHE            | 942          | 11                         | aromatic       | 1,3,9                                       |                                          | PHE            | 728          | 7                          | aromatic       | 2,5                                         |
|                                             | SER            | 943          | 11                         | polar          |                                             |                                          | PHE            | 732          | 7                          | aromatic       | 2                                           |
|                                             | GLN            | 946          | 11                         | polar          | 1                                           |                                          | VAL            | 982          | 12                         | nonpolar       | 3,9                                         |
|                                             | MET            | 949          | 11                         | nonpolar       | 2,9                                         |                                          | PHE            | 983          | 12                         | aromatic       | 2                                           |
|                                             | TYR            | 950          | 11                         | aromatic       |                                             |                                          | ALA            | 985          | 12                         | nonpolar       | 3,9                                         |
|                                             |                |              |                            |                |                                             |                                          | MET            | 986          | 12                         | nonpolar       | 2                                           |
|                                             |                |              |                            |                |                                             |                                          | GLY            | 989          | 12                         | nonpolar       |                                             |
|                                             |                |              |                            |                |                                             |                                          | GLN            | 990          | 12                         | polar          | 2,9                                         |
|                                             |                |              |                            |                |                                             |                                          | PHE            | 994          | 12                         | aromatic       |                                             |

| <u>Dauno-</u><br><u>rubicin</u><br><u>4</u> | <u>resname</u> | <u>resid</u> | <u>TM-</u><br><u>helix</u> | <u>AA-type</u> | <u>Exp't-</u><br><u>ally</u><br><u>ID'd</u> | <u>Vera-</u><br><u>pamil</u><br><u>4</u> | <u>resname</u> | <u>resid</u> | <u>TM-</u><br><u>helix</u> | <u>AA-type</u> | <u>Exp't-</u><br><u>ally</u><br><u>ID'd</u> |
|---------------------------------------------|----------------|--------------|----------------------------|----------------|---------------------------------------------|------------------------------------------|----------------|--------------|----------------------------|----------------|---------------------------------------------|
|                                             | HIS            | 61           | 1                          | basic          | 7                                           |                                          | LEU            | 225          | 4                          | nonpolar       |                                             |
|                                             | ALA            | 129          | 2                          | nonpolar       |                                             |                                          | TRP            | 232          | 4                          | aromatic       |                                             |
|                                             | GLN            | 132          | 2                          | polar          |                                             |                                          | ILE            | 299          | 5                          | nonpolar       | 2                                           |
|                                             | VAL            | 133          | 2                          | nonpolar       |                                             |                                          | ALA            | 302          | 5                          | nonpolar       | 1,8                                         |
|                                             | MET            | 192          | 3                          | nonpolar       |                                             |                                          | PHE            | 303          | 5                          | aromatic       | 2,9                                         |
|                                             | GLN            | 195          | 3                          | polar          |                                             |                                          | ILE            | 306          | 5                          | nonpolar       | 3,5                                         |
|                                             | GLN            | 347          | 6                          | polar          |                                             |                                          | TYR            | 307          | 5                          | aromatic       | 2                                           |
|                                             | GLU            | 875          | 0                          | acidic         |                                             |                                          | TYR            | 310          | 5                          | aromatic       | 2                                           |
|                                             | MET            | 876          | 0                          | nonpolar       |                                             |                                          | PHE            | 336          | 6                          | aromatic       | 2,9                                         |
|                                             | PHE            | 938          | 11                         | aromatic       |                                             |                                          | PHE            | 343          | 6                          | aromatic       | 2,3,<br>5,6                                 |
|                                             | PHE            | 942          | 11                         | aromatic       | 1,3,9                                       |                                          | PHE            | 728          | 7                          | aromatic       | 2,5                                         |
|                                             | GLN            | 946          | 11                         | polar          | 1                                           |                                          | PHE            | 732          | 7                          | aromatic       | 2                                           |
|                                             | MET            | 986          | 12                         | nonpolar       | 2                                           |                                          | VAL            | 982          | 12                         | nonpolar       | 3,9                                         |
|                                             |                |              |                            |                |                                             |                                          | PHE            | 983          | 12                         | aromatic       | 3                                           |
|                                             |                |              |                            |                |                                             |                                          | MET            | 986          | 12                         | nonpolar       | 2                                           |
|                                             |                |              |                            |                |                                             |                                          | GLN            | 990          | 12                         | polar          | 2,9                                         |
|                                             |                |              |                            |                |                                             |                                          | PHE            | 994          | 12                         | aromatic       |                                             |

| <u>Dauno-</u><br><u>rubicin</u><br><u>5</u> | <u>resname</u> | <u>resid</u> | <u>TM-</u><br><u>helix</u> | <u>AA-type</u> | <u>Exp't-</u><br><u>ally</u><br><u>ID'd</u> | <u>Vera-</u><br><u>pamil</u><br><u>5</u> | <u>resname</u> | <u>resid</u> | <u>TM-</u><br><u>helix</u> | <u>AA-type</u> | <u>Exp't-</u><br><u>ally</u><br><u>ID'd</u> |
|---------------------------------------------|----------------|--------------|----------------------------|----------------|---------------------------------------------|------------------------------------------|----------------|--------------|----------------------------|----------------|---------------------------------------------|
|                                             | HIS            | 61           | 1                          | basic          | 7                                           |                                          | TRP            | 232          | 4                          | aromatic       |                                             |
|                                             | LEU            | 65           | 1                          | nonpolar       | 2,4,7                                       |                                          | ILE            | 299          | 5                          | nonpolar       | 2                                           |
|                                             | ALA            | 129          | 2                          | nonpolar       |                                             |                                          | ALA            | 302          | 5                          | nonpolar       | 1,8                                         |
|                                             | GLN            | 132          | 2                          | polar          |                                             |                                          | PHE            | 303          | 5                          | aromatic       | 2,9                                         |
|                                             | VAL            | 133          | 2                          | nonpolar       |                                             |                                          | ILE            | 306          | 5                          | nonpolar       | 3,5                                         |
|                                             | ASP            | 188          | 3                          | acidic         |                                             |                                          | TYR            | 307          | 5                          | aromatic       | 2                                           |
|                                             | MET            | 192          | 3                          | nonpolar       |                                             |                                          | TYR            | 310          | 5                          | aromatic       | 2                                           |
|                                             | GLN            | 195          | 3                          | polar          |                                             |                                          | PHE            | 336          | 6                          | aromatic       | 2,9                                         |
|                                             | GLN            | 347          | 6                          | polar          |                                             |                                          | LEU            | 339          | 6                          | nonpolar       | 1,3,9                                       |
|                                             | GLU            | 875          | 0                          | acidic         |                                             |                                          | PHE            | 343          | 6                          | aromatic       | 2,3,<br>5,6                                 |
|                                             | PHE            | 938          | 11                         | aromatic       |                                             |                                          | GLN            | 725          | 7                          | polar          | 2                                           |
|                                             | PHE            | 942          | 11                         | aromatic       | 1,3,9                                       |                                          | PHE            | 728          | 7                          | aromatic       | 2,5                                         |
|                                             | GLN            | 946          | 11                         | polar          | 1                                           |                                          | PHE            | 732          | 7                          | aromatic       | 2                                           |
|                                             | MET            | 949          | 11                         | nonpolar       | 2                                           |                                          | PHE            | 770          | 8                          | aromatic       | 2                                           |
|                                             | TYR            | 950          | 11                         | aromatic       |                                             |                                          | GLN            | 838          | 9                          | polar          |                                             |
|                                             |                |              |                            |                |                                             |                                          | MET            | 986          | 12                         | nonpolar       | 2                                           |
|                                             |                |              |                            |                |                                             |                                          | GLN            | 990          | 12                         | polar          | 2,9                                         |
|                                             |                |              |                            |                |                                             |                                          | PHE            | 994          | 12                         | aromatic       |                                             |

| <u>Dauno-</u><br><u>rubicin</u><br><u>6</u> | <u>resname</u> | <u>resid</u> | <u>TM-</u><br><u>helix</u> | <u>AA-type</u> | <u>Exp't-</u><br><u>ally</u><br><u>ID'd</u> | <u>Vera-</u><br><u>pamil</u><br><u>6</u> | <u>resname</u> | <u>resid</u> | <u>TM-</u><br><u>helix</u> | <u>AA-type</u> | <u>Exp't-</u><br><u>ally</u><br><u>ID'd</u> |
|---------------------------------------------|----------------|--------------|----------------------------|----------------|---------------------------------------------|------------------------------------------|----------------|--------------|----------------------------|----------------|---------------------------------------------|
|                                             | HIS            | 61           | 1                          | basic          | 7                                           |                                          | TRP            | 232          | 4                          | aromatic       |                                             |
|                                             | LEU            | 65           | 1                          | nonpolar       | 2,4,7                                       |                                          | ILE            | 299          | 5                          | nonpolar       | 2                                           |
|                                             | ALA            | 129          | 2                          | nonpolar       |                                             |                                          | ALA            | 302          | 5                          | nonpolar       | 1,8                                         |
|                                             | LYS            | 189          | 3                          | basic          |                                             |                                          | PHE            | 303          | 5                          | aromatic       | 2,9                                         |
|                                             | MET            | 192          | 3                          | nonpolar       |                                             |                                          | TYR            | 307          | 5                          | aromatic       | 2                                           |
|                                             | GLN            | 195          | 3                          | polar          |                                             |                                          | PHE            | 336          | 6                          | aromatic       | 2,9                                         |
|                                             | GLN            | 347          | 6                          | polar          |                                             |                                          | GLN            | 725          | 7                          | polar          | 2                                           |
|                                             | GLU            | 875          | 0                          | acidic         |                                             |                                          | PRO            | 726          | 7                          | nonpolar       |                                             |
|                                             | MET            | 876          | 0                          | nonpolar       |                                             |                                          | PHE            | 728          | 7                          | aromatic       | 2,5                                         |
|                                             | PHE            | 942          | 11                         | aromatic       | 1,3,9                                       |                                          | ALA            | 729          | 7                          | nonpolar       |                                             |
|                                             | THR            | 945          | 11                         | polar          | 3                                           |                                          | PHE            | 732          | 7                          | aromatic       | 2                                           |
|                                             | GLN            | 946          | 11                         | polar          | 1                                           |                                          | PHE            | 770          | 8                          | aromatic       | 2                                           |
|                                             |                |              |                            |                |                                             |                                          | SER            | 979          | 12                         | polar          |                                             |
|                                             |                |              |                            |                |                                             |                                          | VAL            | 982          | 12                         | nonpolar       | 3,9                                         |
|                                             |                |              |                            |                |                                             |                                          | PHE            | 983          | 12                         | aromatic       | 2                                           |
|                                             |                |              |                            |                |                                             |                                          | MET            | 986          | 12                         | nonpolar       | 2                                           |
|                                             |                |              |                            |                |                                             |                                          | GLN            | 990          | 12                         | polar          | 2,9                                         |
|                                             |                |              |                            |                |                                             |                                          | SER            | 993          | 12                         | polar          | 1                                           |
|                                             |                |              |                            |                |                                             |                                          | PHE            | 994          | 12                         | aromatic       |                                             |

**Supplemental Table II. Amino acid residues found to be within 4.5 Å of tariquidar docked at the three tariquidar sites described in the text and Figure 4.**

Site 1:

T240, E243, L244, Y247, A248, A250, G251, A252, A254, E255, L281, K285, K291, T785, R789, T815, L818, A819, A822, A823, N824, K826, G827, G830, D997

Site 2:

W232, A292, N296, I299, F303, A718, N721, G722, Q725, F770, Q773, G774, F777, G778, G781, A823, K826, G827, G830, S831, L833, A834, T837, Q838, M986, Q990, F994, N997

Site 3:

M69, F72, F303, Y307, Y310, F314, T333, F336, S337, I340, F728, F732, V865, I868, A869, G872, V873, M949, S952, Y953, F978, V981, V982, G984, A985, M986, V988

**Supplemental Figure 1. Human P-glycoprotein conformations extracted from TMD simulations at the indicated molecular dynamics target.** The top row shows human P-gp models at the four indicated target structures. The bottom row shows the equivalent structures rotated about the Y-axis by 90°. Human P-gp was pushed to each structure in TMD simulations as described in <sup>(32)</sup> and Methods. Each structure shown has calculated RMSD values for the targeted C $\alpha$  atoms of < 0.3 Å. The indicated targets were mouse P-gp (4KSB)<sup>(28)</sup>, lipid flippase MsbA (3B5X)<sup>(19)</sup>, bacterial *Sav1866* (2HYD)<sup>(22)</sup>, and the transition state MsbA structure (3B5Z)<sup>(19)</sup>.

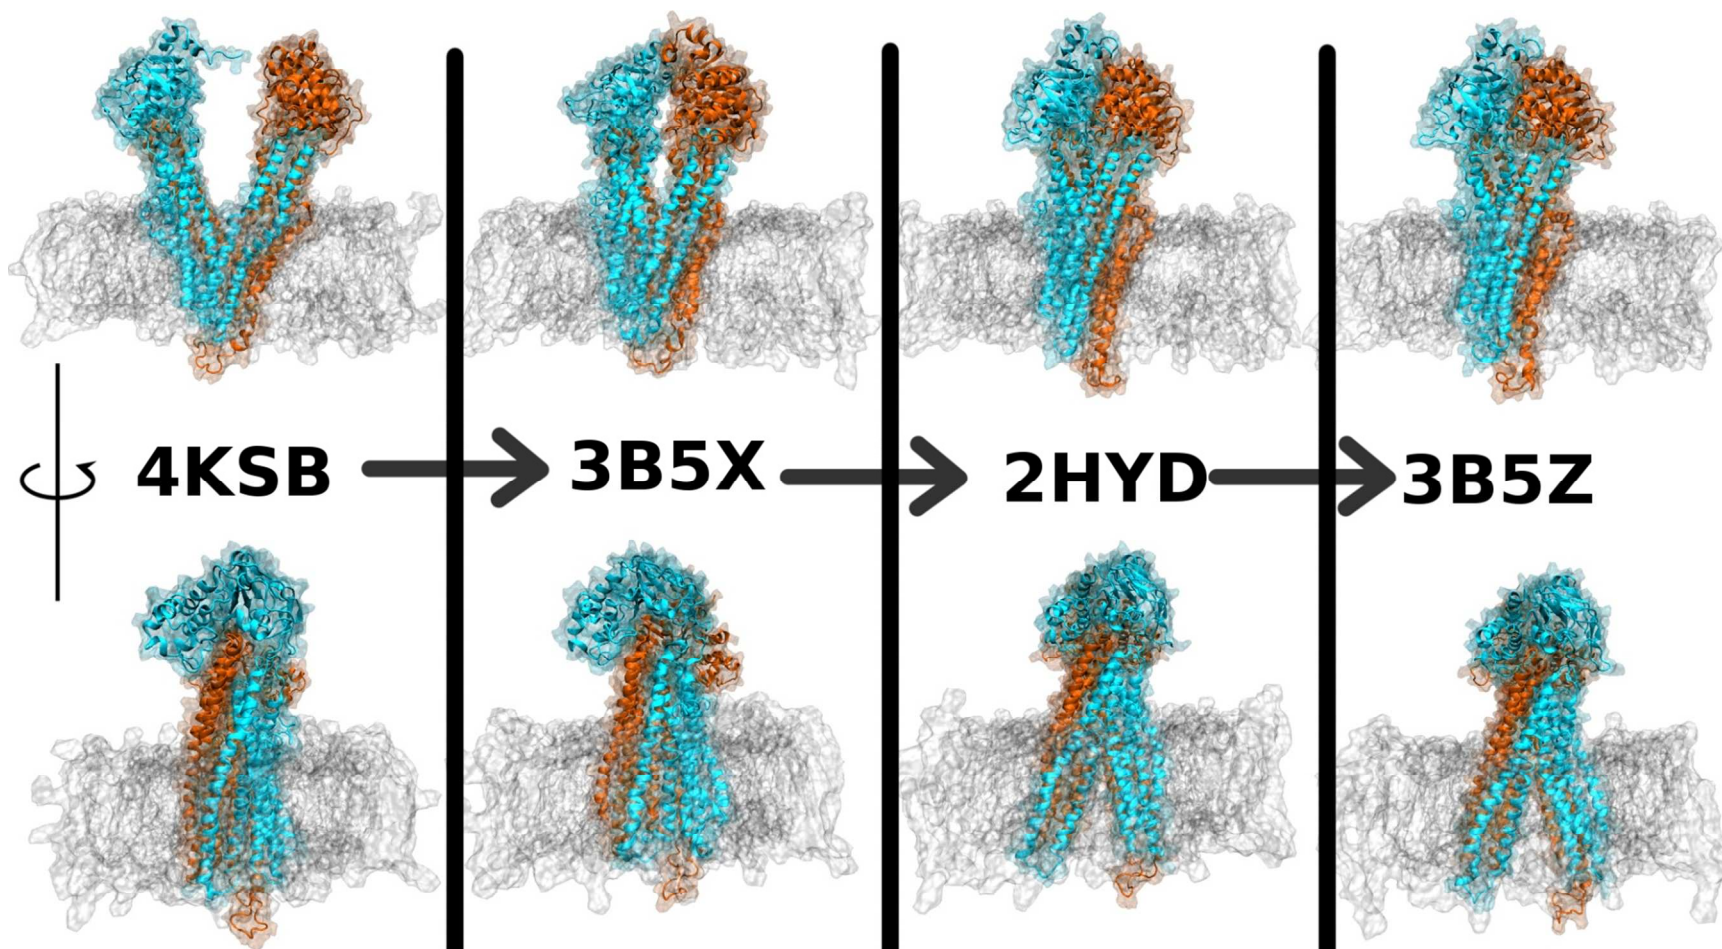

**Supplemental Figure 2. Dynamics of drug transport through P-glycoprotein: Daunorubicin movement.** The figure shows an animation of Daunorubicin moving through the membrane during the targeted molecular dynamics simulations described in the text.

**Supplemental Figure 3. Dynamics of drug transport through P-glycoprotein: Verapamil movement.** The figure shows an animation of Verapamil moving through the membrane during the targeted molecular dynamics simulations described in the text.



**Supplemental Figure 4. Movement of Daunorubicin and Verapamil through P-glycoprotein when positioned at non-optimal starting locations within the drug binding sites.** Docking of daunorubicin and verapamil was performed as described in the text. Panel A shows the average movement of daunorubicin during a simulated catalytic cycle (squares – daunorubicin starting at the putative R site – data reproduced from Figure 3; triangles – daunorubicin at the putative H site). Panel B shows the average movement of verapamil (squares – starting at the putative H site – data reproduced from Figure 3; triangles – starting at the putative R site). Panel C shows the variability observed in the individual runs made with verapamil starting at the putative R site.

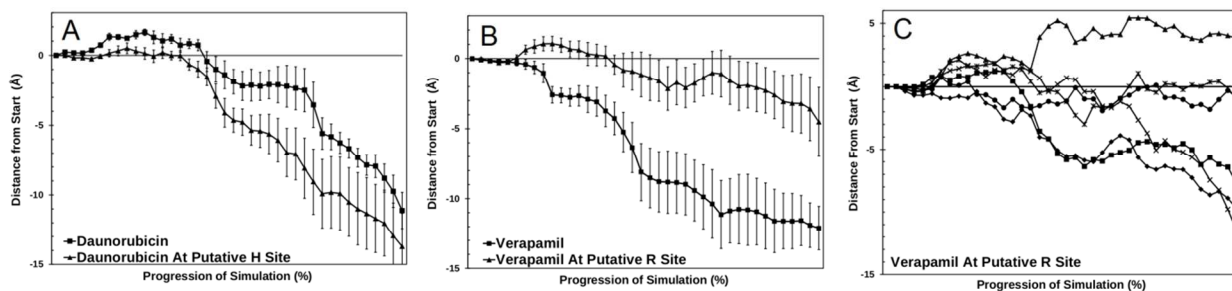

**Supplemental Figure 5. Movement of Daunorubicin through P-gp for all six simulations.** Results are similar to those shown in Figure 5 except that the results from each individual simulation are presented. Each panel shows 3D plots of the numbers of contacts of the transmembrane helices of P-gp that were within 4.5Å of Daunorubicin during the six independent simulations versus the progress of the TMD experiment given in percent completion. Helices 0 through 12 represent the 12 membrane helices of P-gp (labeled 1-12) while “0” represents any contact with Daunorubicin outside of the 12 TMs. The individual simulations are plotted separately and are labeled “Daunorubicin 1” through “Daunorubicin 6”.

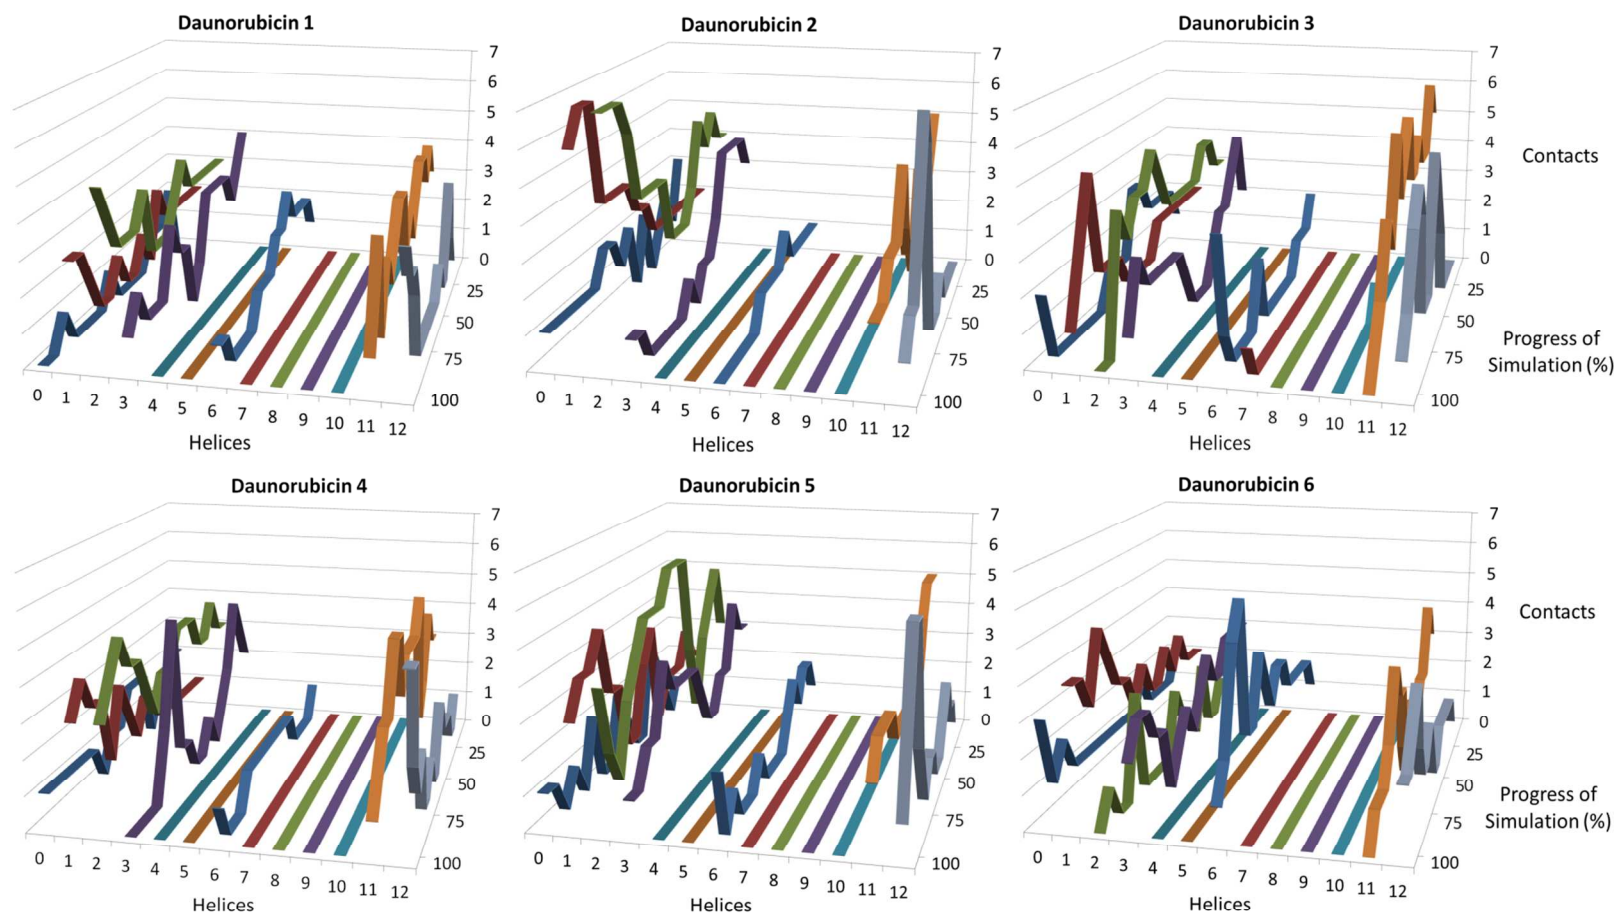

**Supplemental Figure 6. Movement of Verapamil through P-gp for all six simulations.** Results are similar to those shown in Supplemental Figure 5 except that the results from each of the individual simulations with Verapamil are presented.

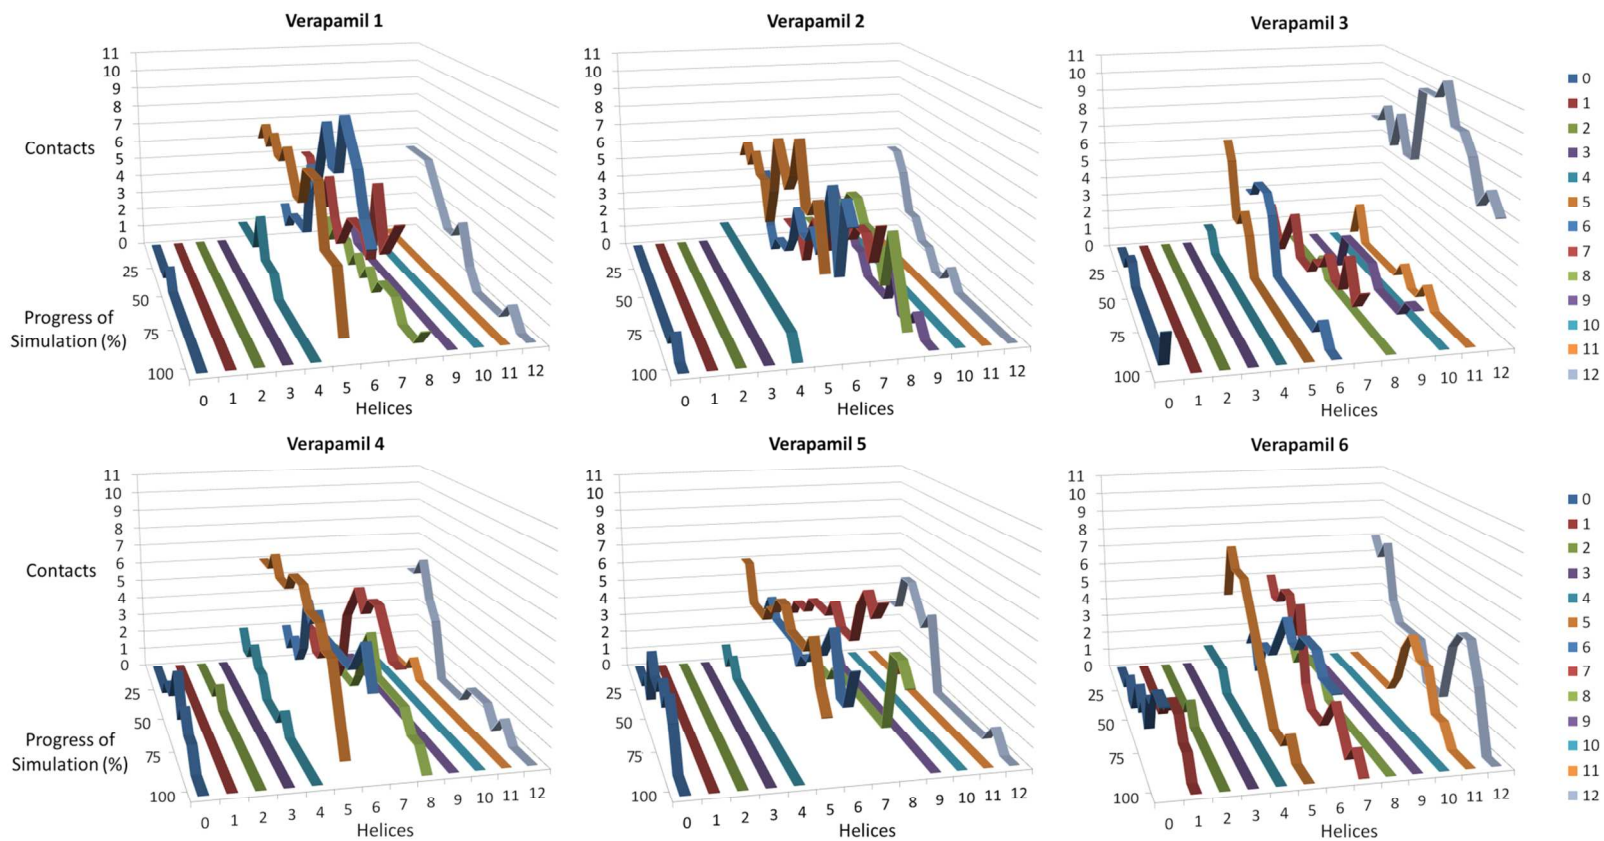

**Supplemental Figure 7.** Interactions between P-gp and Daunorubicin (left) or Verapamil (right) with acidic (top) or basic (bottom) residues of the transmembrane helices. Averages of the contacts for all six simulations are presented.

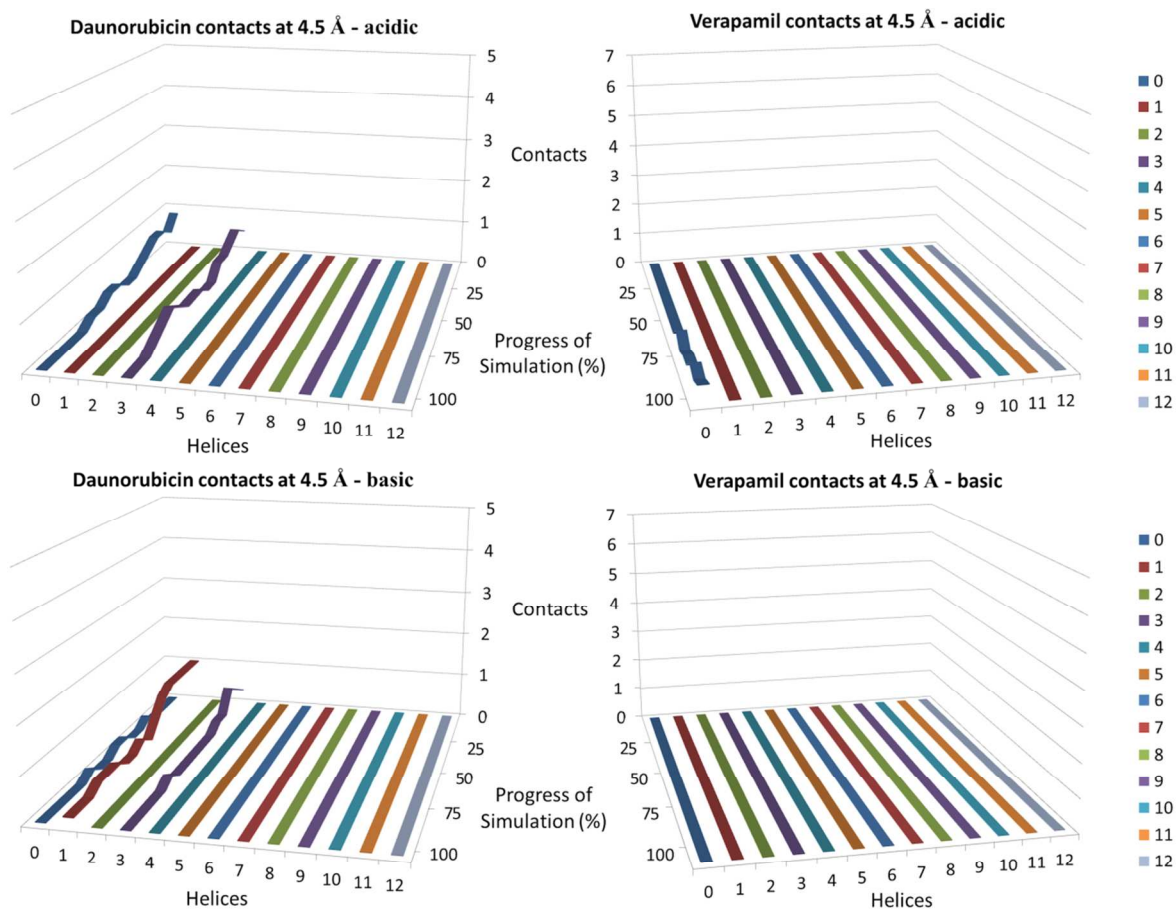

**Supplemental Figure 8. RMSD changes for Daunorubicin and Verapamil during targeted molecular dynamics simulations.** The movement of either Daunorubicin (simulation 6) or Verapamil (simulation 6) was plotted as the respective root mean squared deviation (RMSD, in Å) versus the progress of the simulation.

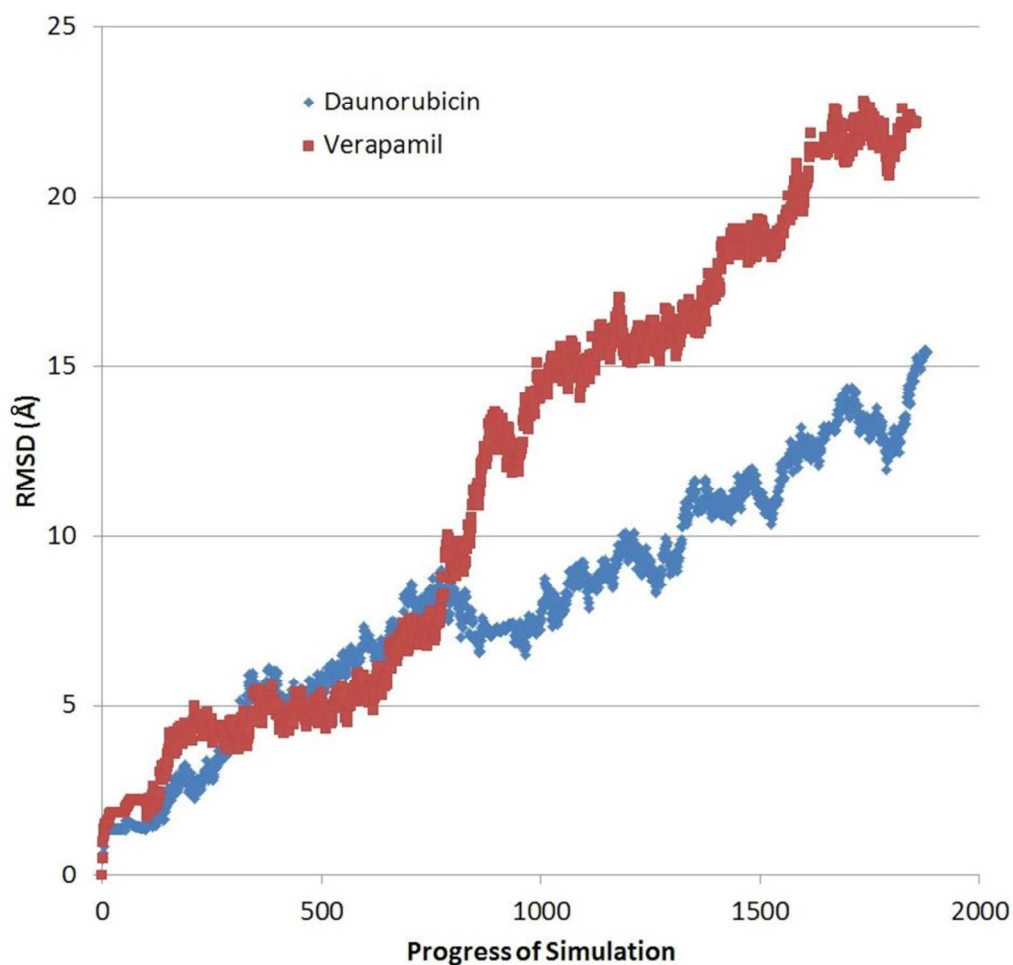

Supplement: NIHMS704251-supplement-Supplemental_Information.pdf [file NIHMS704251-supplement-Supplemental_Information.pdf]
